# Supplementary material
Source: PubMed Central journal article supplement (PMC1630442)
Supplement: pgen.0020165.st001.pdf [file pgen.0020165.st001.pdf]

## Table S1: Supplementary information on genes in the three gene sets

Walser et al. 2006

Heat-shock promoters: targets for evolution by *P* transposable elements in *Drosophila*

Sources used for the tables and for further information:

(1) *Drosophila* developmental gene expression timecourse  
<http://genome.med.yale.edu/Lifecycle/>

*Drosophila* Developmental Gene Expression Timecourse (<http://genome.med.yale.edu/Lifecycle/>).

Color coded time course for gene list: 

Yellow color represents high relative levels of expression while blue represents low levels. The brightest color is three-fold or greater differential from the reference black

(2) FlyBase - a database of the *Drosophila* Genome  
<http://flybase.bio.indiana.edu/>

(3) FlyGRID - a database of genetic and physical interactions developed  
[http://biodata.mshri.on.ca:80/fly\\_grid/servlet/SearchPage](http://biodata.mshri.on.ca:80/fly_grid/servlet/SearchPage)

(4) MitoDrome – a database with the aim to annotate the complete set of *Drosophila melanogaster* nuclear genes encoding for mitochondrial proteins in order to contribute to their functional characterization.  
<http://www2.ba.itb.cnr.it/MitoDrome/>

(5) BDGP Gene Expression Summary  
<http://www.fruitfly.org/cgi-bin/ex/bquery.pl?qpage=entry&qtype=summary>

**Gene Set I.** Heat-inducible genes, *hsp* genes, chaperone genes. ID: FlyBase ID; SYM This is the standard abbreviation (gene symbol) for the name of the gene.; Location: Chromosome arm and Location of the gene on the cytological (polytene chromosome) map. Developmental Gene Expression Timecourse (for color code see above)

| ID      | SYM                           | Location | Metamorphosis |        |          |       | Adult |   | Ref.  |
|---------|-------------------------------|----------|---------------|--------|----------|-------|-------|---|-------|
|         |                               |          | Embryo        | Larvae | Prepupae | Pupae | □     | □ |       |
| CG4460  | <i>Hsp22</i>                  | 3L-67B2  |               |        |          |       |       |   | 1-5   |
| CG4463  | <i>Hsp23</i>                  | 3L-67B3  |               |        |          |       |       |   | 1,5   |
| CG4183  | <i>Hsp26</i>                  | 3L-67B2  |               |        |          |       |       |   | 1,5   |
| CG4466  | <i>Hsp27</i>                  | 3L-67B3  |               |        |          |       |       |   | 1,5   |
| CG5436  | <i>Hsp68</i>                  | 3R-95D11 |               |        |          |       |       |   | 5     |
| CG18743 | <i>Hsp70Ab</i>                | 3R-87A3  |               |        |          |       |       |   | 1,5,6 |
| CG1242  | <i>Hsp83</i>                  | 3L-63B11 |               |        |          |       |       |   | 5     |
| CR31400 | <i>Hrs<math>\omega</math></i> | 3R-93D4  |               |        |          |       |       |   | 7     |
| CG10578 | <i>DnaJ-1</i>                 | 3L-64E5  |               |        |          |       |       |   | 8     |
| CG12240 | <i>DnaJ-60</i>                | 2R-60C1  |               |        |          |       |       |   | 9     |
| CG5504  | <i>DnaJ</i>                   | 2R-59F6  |               |        |          |       |       |   | 10    |
| CG9920  |                               | 3R-88A8  |               |        |          |       |       |   |       |
| CG12101 | <i>Hsp60</i>                  | X-10A4   |               |        |          |       |       |   | 11    |
| CG2830  | <i>Hsp60b</i>                 | 2L-21E2  |               |        |          |       |       |   | 12    |
| CG7756  | <i>Hsc70-2</i>                | 3R-87D10 |               |        |          |       |       |   | 13-15 |
| CG4147  | <i>Hsc70-3</i>                | X-10E3-4 |               |        |          |       |       |   | 14,15 |
| CG4264  | <i>Hsc70-4</i>                | 3R-88E4  |               |        |          |       |       |   | 13-15 |
| CG8542  | <i>Hsc70-5</i>                | 2R-50E6  |               |        |          |       |       |   | 14,15 |
| CG4167  | <i>Hsp67Ba</i>                | 3L-67B21 |               |        |          |       |       |   | 5     |

Red: Location in areas known for high recombination (Charlesworth B (1996) Background selection and patterns of genetic diversity in *Drosophila melanogaster*. Genetical Research 68: 131-149)

**Gene Set II.** Genes resembling *hsp70* in regulation by polymerase pausing or DNase hypersensitivity. ID: FlyBase ID; SYM This is the standard abbreviation (gene symbol) for the name of the gene; Location: Chromosome arm and Location of the gene on the cytological (polytene chromosome) map. Genes resembling *hsp70* in regulation by A) polymerase pausing, B) Dnase hypersensitivity, C) high germline transcriptional activity <sup>16</sup>, D) duplicated genes. Developmental Gene Expression Timecourse (for color code see above) and Reference.

| ID      | SYM            | Location  |   | Metamorphosis |        |          |       | Adult |   | Ref.     |
|---------|----------------|-----------|---|---------------|--------|----------|-------|-------|---|----------|
|         |                |           |   | Embryo        | Larvae | Prepupae | Pupae | □     | □ |          |
| CG12055 | <i>Gapdh1</i>  | 2R-43E17  | A |               |        |          |       |       |   | 17       |
| CG8893  | <i>Gapdh2</i>  | X-13F17   | A |               |        |          |       |       |   | 18-21    |
| CG9277  | <i>βTub56D</i> | 2R-56D7-8 | A |               |        |          |       |       |   | 18       |
| CG10798 | <i>dm</i>      | X-3D2     | A |               |        |          |       |       |   | 22-25    |
| CG3481  | <i>adh</i>     | (2L)-35B3 | A |               |        |          |       |       |   |          |
| CG12181 | <i>Sgs4</i>    | X-3C10    | B |               |        |          |       |       |   | 26,27    |
| CG6222  | <i>su(s)</i>   | X-1B13    | B |               |        |          |       |       |   | 28       |
| CG4027  | <i>Act5C</i>   | X-5C7     | B |               |        |          |       |       |   | 18,29,30 |
| CG4550  | <i>ninaE</i>   | 3R-92B4   | B |               |        |          |       |       |   | 31       |
| CG7939  | <i>RpL32</i>   | 3R-99D3   | B |               |        |          |       |       |   | 32       |
| CG6382  | <i>Elf</i>     | 2L-33E4-5 | C |               |        |          |       |       |   |          |
| CG8040  | <i>CG32061</i> | 3L-67E3   | C |               |        |          |       |       |   |          |
| CG13340 |                | 2R-50C5   | C |               |        |          |       |       |   |          |
| CG4750  |                | 2R-53C7   | C |               |        |          |       |       |   |          |
| CG2512  | <i>αTub84D</i> | 3R-84D9   | D |               |        |          |       |       |   | 33-36    |
| CG1913  | <i>αTub84B</i> | 3R-84R4   | D |               |        |          |       |       |   | 33-36    |
| CG2238  | <i>Ef2b</i>    | 2L-39Ef   | D |               |        |          |       |       |   | 37       |
| CG11181 | <i>cup</i>     | X-26F5-6  | D |               |        |          |       |       |   | 38       |

Red: areas known for high recombination (Charlesworth B (1996) Background selection and patterns of genetic diversity in *Drosophila melanogaster*. *Genetical Research* 68: 131-149)

**Gene Set III.** Non-*hsp* genes with limited transcription during the life cycle and negligible germ-line expression (features expected to minimize transposition and its vertical transmission). ID: FlyBase ID; SYM This is the standard abbreviation (gene symbol) for the name of the gene.; Location: Chromosome arm and Location of the gene on the cytological (polytene chromosome) map. Developmental Gene Expression Timecourse (for color code see above) and Reference.

| ID      | SYM           | Location  | Metamorphosis |        |          |       | Adult                    |                          | Ref. |
|---------|---------------|-----------|---------------|--------|----------|-------|--------------------------|--------------------------|------|
|         |               |           | Embryo        | Larvae | Prepupae | Pupae | <input type="checkbox"/> | <input type="checkbox"/> |      |
| CG7906  |               | 3L-70D4   |               |        |          |       | <input type="checkbox"/> | <input type="checkbox"/> |      |
| CG7924  |               | 3L-70D4   |               |        |          |       | <input type="checkbox"/> | <input type="checkbox"/> |      |
| CG15634 |               | 2L-25A3   |               |        |          |       | <input type="checkbox"/> | <input type="checkbox"/> |      |
| CG12011 |               | 3L-62B1   |               |        |          |       | <input type="checkbox"/> | <input type="checkbox"/> |      |
| CG4818  |               | 3L-72E2   |               |        |          |       | <input type="checkbox"/> | <input type="checkbox"/> |      |
| CG2916  | <i>Sep5</i>   | 2R-43F8   |               |        |          |       | <input type="checkbox"/> | <input type="checkbox"/> |      |
| CG10591 |               | 3L-64D5   |               |        |          |       | <input type="checkbox"/> | <input type="checkbox"/> |      |
| CG11650 | <i>Lcp1</i>   | 2R-44CR   |               |        |          |       | <input type="checkbox"/> | <input type="checkbox"/> |      |
| CG2961  | <i>Ipod</i>   | X-9B4     |               |        |          |       | <input type="checkbox"/> | <input type="checkbox"/> |      |
| CG9506  | <i>slam</i>   | 2L-26C4   |               |        |          |       | <input type="checkbox"/> | <input type="checkbox"/> |      |
| CG7252  |               | 3L-68E3   |               |        |          |       | <input type="checkbox"/> | <input type="checkbox"/> |      |
| CG4602  | <i>Srp54</i>  | 2L-30E4   |               |        |          |       | <input type="checkbox"/> | <input type="checkbox"/> |      |
| CG9984  | <i>TH1</i>    | X-14C2    |               |        |          |       | <input type="checkbox"/> | <input type="checkbox"/> |      |
| CG14025 | <i>Bsg25D</i> | 2L-25D2-3 |               |        |          |       | <input type="checkbox"/> | <input type="checkbox"/> |      |
| CG10154 |               | 3L-70B1   |               |        |          |       | <input type="checkbox"/> | <input type="checkbox"/> |      |
| CG7724  |               | 3L-73E5   |               |        |          |       | <input type="checkbox"/> | <input type="checkbox"/> |      |
| CG2070  |               | 2R-43E8   |               |        |          |       | <input type="checkbox"/> | <input type="checkbox"/> |      |
| CG6296  |               | 3R-97D13  |               |        |          |       | <input type="checkbox"/> | <input type="checkbox"/> |      |

Red: Location in areas known for high recombination (Charlesworth B (1996) Background selection and patterns of genetic diversity in *Drosophila melanogaster*. *Genetical Research* 68: 131-149)

## Reference List

1. Simon, J.A. & Lis, J.T. A germline transformation analysis reveals flexibility in the organization of heat-shock consensus elements. *Nucleic Acids Research* **15**, 2971-2988 (1987).
2. Klemenz, R. & Gehring, W.J. The control region of the Drosophila heat-shock gene Hsp22. *Experientia* **42**, 649-649 (1986).
3. Klemenz, R. & Gehring, W.J. Sequence requirement for expression of the Drosophila melanogaster heat-shock protein Hsp22-gene during heat-shock and normal development. *Molecular And Cellular Biology* **6**, 2011-2019 (1986).
4. Hultmark, D., Klemenz, R. & Gehring, W.J. Translational and transcriptional control elements in the untranslated leader of the heat-shock gene Hsp22. *Cell* **44**, 429-438 (1986).
5. Bonner, J.J. & Kerby, R.L. RNA polymerase II transcribes all of the heat shock-induced genes of Drosophila melanogaster. *Chromosoma* **85**, 93-108 (1982).
6. Lee, H.S., Kraus, K.W., Wolfner, M.F. & Lis, J.T. DNA sequence requirements for generating paused polymerase at the start of hsp70. *Genes & Development* **6**, 284-295 (1992).
7. Bendena, W.G., Aymesouthgate, A., Garbe, J.C. & Pardue, M.L. Expression of heat-shock locus Hsr-omega in nonstressed cells during development in Drosophila melanogaster. *Developmental Biology* **144**, 65-77 (1991).
8. Marchler, G. & Wu, C. Modulation of Drosophila heat shock transcription factor activity by the molecular chaperone DROJ1. *Embo Journal* **20**, 499-509 (2001).
9. Iliopoulos, I., Torok, I. & Mechler, B.M. The DnaJ60 gene of Drosophila melanogaster encodes a new member of the DnaJ family of proteins. *Biological Chemistry* **378**, 1177-1181 (1997).
10. Kurzikdumke, U., Gundacker, D., Rentrop, M. & Gateff, E. Tumor suppression in Drosophila is causally related to the function of the lethal(2)tumorous imaginal disks gene, a DnaJ homolog. *Developmental Genetics* **16**, 64-76 (1995).
11. Ellis, R.J. & Vandervies, S.M. Molecular chaperones. *Annual Review Of Biochemistry* **60**, 321-347 (1991).
12. Timakov, B. & Zhang, P. The hsp60B gene of Drosophila melanogaster is essential for the spermatid individualization process. *Cell Stress & Chaperones* **6**, 71-77 (2001).

13. Craig, E.A., Ingolia, T.D. & Manseau, L.J. Expression of Drosophila heat-shock cognate genes during heat-shock and development. *Developmental Biology* **99**, 418-426 (1983).
14. Rubin, D.M. et al. Genomic structure and sequence-analysis of Drosophila melanogaster Hsc70 genes. *Gene* **128**, 155-163 (1993).
15. Wilke, N., Sganga, M.W., Gayer, G.G., Hsieh, K.P. & Miles, M.F. Characterization of promoter elements mediating ethanol regulation of hsc70 gene transcription. *Journal Of Pharmacology And Experimental Therapeutics* **292**, 173-180 (2000).
16. Boutanaev, A.M., Kalmykova, A.I., Shevelyou, Y.Y. & Nurminsky, D.I. Large clusters of co-expressed genes in the Drosophila genome. *Nature* **420**, 666-669 (2002).
17. Lis, J. Promoter-associated pausing in promoter architecture and postinitiation transcriptional regulation. *Cold Spring Harbor Symposia on Quantitative Biology* **63**, 347-356 (1998).
18. O'Brien, T., Hardin, S., Greenleaf, A. & Lis, J.T. Phosphorylation of RNA polymerase II C-terminal domain and transcriptional elongation. *Nature* **370**, 75-77 (1994).
19. Rasmussen, E.B. & Lis, J.T. Short transcripts of the ternary Complex provide insight into RNA Polymerase II elongational pausing. *Journal of Molecular Biology* **252**, 522-535 (1995).
20. Rougvie, A.E. & Lis, J.T. Postinitiation Transcriptional Control In Drosophila-Melanogaster. *Molecular And Cellular Biology* **10**, 6041-6045 (1990).
21. Sun, X.H., Lis, J.T. & Wu, R. The Positive And Negative Transcriptional Regulation Of The Drosophila Gapdh-2 Gene. *Genes & Development* **2**, 743-753 (1988).
22. Krumm, A., Meulia, T., Brunvand, M. & Groudine, M. The block to transcriptional elongation within the human c-myc gene is determined in the promoter-proximal region. *Genes & Development* **6**, 2201-2213 (1992).
23. Plet, A., Eick, D. & Blanchard, J.M. Elongation and premature termination of transcripts initiated from c-fos and c-myc promoters show dissimilar patterns. *Oncogene* **10**, 319-328 (1995).
24. Spencer, C.A. & Groudine, M. Transcription elongation and eukaryotic gene-regulation. *Oncogene* **5**, 777-785 (1990).
25. Strobl, L.J. & Eick, D. Hold back of RNA Polymerase II at the transcription start site mediates down-regulation of c-myc in vivo. *Embo Journal* **11**, 3307-3314 (1992).

26. McGinnis, W., Shermoen, A.W. & Beckendorf, S.K. A transposable element inserted just 5' to a Drosophila glue protein gene alters gene-expression and chromatin structure. *Cell* **34**, 75-84 (1983).
27. Shermoen, A.W. & Beckendorf, S.K. A complex of interacting DNase I-hypersensitive sites near the Drosophila glue protein gene, Sgs4. *Cell* **29**, 601-607 (1982).
28. Voelker, R.A., Graves, J., Gibson, W. & Eisenberg, M. Mobile element insertions causing mutations in the Drosophila suppressor of sable locus occur in DNase-I hypersensitive subregions of 5'-transcribed nontranslated sequences. *Genetics* **126**, 1071-1082 (1990).
29. Chung, Y.T. & Keller, E.B. Positive and negative regulatory elements mediating transcription from the Drosophila melanogaster actin-5c distal promoter. *Molecular And Cellular Biology* **10**, 6172-6180 (1990).
30. Chung, Y.T. & Keller, E.B. Regulatory elements mediating transcription from the Drosophila melanogaster actin 5C proximal promoter. *Molecular And Cellular Biology* **10**, 206-216 (1990).
31. Picking, W.L. et al. Control of Drosophila opsin gene expression by carotenoids and retinoic acid: Northern and western analyses. *Experimental Eye Research* **63**, 493-500 (1996).
32. Wong, Y.C., Oconnell, P., Rosbash, M. & Elgin, S.C.R. DNase I hypersensitive sites of the chromatin for Drosophila melanogaster ribosomal protein 49 gene. *Nucleic Acids Research* **9**, 6749-6762 (1981).
33. Theurkauf, W.E., Baum, H., Bo, J.Y. & Wensink, P.C. Tissue-specific and constitutive alpha-Tubulin genes of Drosophila melanogaster code for structurally distinct proteins. *Proceedings Of The National Academy Of Sciences Of The United States Of America* **83**, 8477-8481 (1986).
34. Mischke, D. & Pardue, M.L. Organization and expression of alpha-Tubulin genes in Drosophila melanogaster - One member of the alpha-Tubulin multigene family is transcribed in both oogenesis and later embryonic-development. *Journal Of Molecular Biology* **156**, 449-466 (1982).
35. Kalfayan, L. & Wensink, P.C. Alpha-Tubulin genes of Drosophila. *Cell* **24**, 97-106 (1981).
36. Mischke, D. & Pardue, M.L. Organization and expression of alpha-Tubulin genes in Drosophila melanogaster. *European Journal Of Cell Biology* **22**, 14-14 (1980).

37. Grinblat, Y., Brown, N.H. & Kafatos, F.C. Isolation and characterization of the *Drosophila* translational elongation factor-II Gene. *Nucleic Acids Research* **17**, 7303-7314 (1989).
38. Wilhelm, J.E., Hilton, M., Amos, Q. & Henzel, W.J. Cup is an eIF4E binding protein required for tooth the translational repression of oskar and the recruitment of Barentsz. *Journal Of Cell Biology* **163**, 1197-1204 (2003).
