# Supplementary material
Source: PubMed Central journal article supplement (PMC1630442)
Supplement: pgen.0020165.st002.pdf [file pgen.0020165.st002.pdf]

| <b>Table S2: UFW Primers for Gene Set I</b> |          |                             |        |       |
|---------------------------------------------|----------|-----------------------------|--------|-------|
| SET                                         | Primer   | Sequence 5'-3'              | Length | Tm    |
|                                             |          |                             | [bp]   | [°C]  |
| 1                                           | Hsp22_1a | CCAgCACCTTgACCTTTAgC        | 20     | 59.88 |
| 1                                           | Hsp22_2a | CgggCggCTCgTggAAgAAg (N) 10 | 30     |       |
| 1                                           | Hsp22_3a | gACgTCCAgggTgAgTTTgT        | 20     | 60.01 |
| 1                                           | Hsp22_4a | CgTgAAAgggCgAggAgAgg        | 20     | 66.63 |
| 1                                           | Hsp22_5a | ATCggTAAggaACgCATTgT        | 20     | 59.46 |
| 1                                           | Hsp22_1b | ggAggAAgTgCCTggAgCTA        | 21     | 61.82 |
| 1                                           | Hsp22_2b | gATTTTCCCTCCACCaggAC (N) 10 | 30     |       |
| 1                                           | Hsp22_3b | CCTTgACCTTTAgCTCgCTgT       | 21     | 60.93 |
| 1                                           | Hsp22_4b | gAgCgAACTCCTgCTCCTg         | 19     | 61.25 |
| 1                                           | Hsp22_5b | CAATCTgCTgCCAgTTCCTC        | 20     | 60.94 |
| 1                                           | Hsp22_6b | CCTTgACCTTTAgCTCgCTgT       | 21     | 60.93 |
| 1                                           | Hsp22_7b | gTggAAgAAggCgTgAAAgg        | 20     | 62.07 |
| 1                                           | Hsp23_1a | CAgAgCATAgCggCggACAA        | 20     | 66.86 |
| 1                                           | Hsp23_2a | TCCTTTCcGATTTTCgACAC (N) 10 | 30     |       |
| 1                                           | Hsp23_3a | ACggAgTTgTCCTgCACTTT        | 20     | 59.77 |
| 1                                           | Hsp23_4a | TgCTgCTCCATCggTCCAAC        | 20     | 66.91 |
| 1                                           | Hsp23_5a | ggCAAaggCTCAACAACAATg       | 20     | 61.61 |
| 1                                           | Hsp23_1b | CCTgCACTTTgACCACCAgT        | 20     | 61.16 |
| 1                                           | Hsp23_1b | gTCCAACCagggCCAAgTAg (N) 10 | 25     |       |
| 1                                           | Hsp23_1b | gACCTggAAgCCATCCTTTC        | 20     | 60.97 |
| 1                                           | Hsp23_1b | CTCTggCgCTggCAgTAgTA        | 20     | 61.65 |
| 1                                           | Hsp23_1b | ggCTCATAgAAgggCACCAT        | 20     | 61.38 |
| 1                                           | Hsp23_1b | gCCCACCTgTTTCTCCAg          | 18     | 59.18 |
| 1                                           | Hsp23_1b | ggCAAaggCTCAACAACAATg       | 20     | 61.61 |
| 1                                           | Hsp26-1a | ACCAAgATggAgTCgTCCAC        | 20     | 59.97 |
| 1                                           | Hsp26-2a | TgTTCCTTTTgCgAgATTgA (N) 10 | 30     |       |
| 1                                           | Hsp26-3a | ATCCACAAGCgAAAgCAGAg        | 20     | 60.54 |
| 1                                           | Hsp26-4a | TCTgTgCTCTgTTCgTCAAg        | 20     | 57.67 |
| 1                                           | Hsp26-5a | TACCCgCTggAgCTTTTCTA        | 20     | 59.97 |
| 1                                           | Hsp26-1b | CATTCCCgCTACgTgCTg          | 18     | 61.40 |
| 1                                           | Hsp26-2b | TgTTCCTTTTgCgAgATTgA (N) 10 | 25     |       |
| 1                                           | Hsp26-3b | CCCAgTCCAAGCTCgTAgAT        | 20     | 59.31 |
| 1                                           | Hsp26-4b | TCTgTgCTCTgTTCgTCAAg        | 20     | 57.67 |
| 1                                           | Hsp26-5b | TACCCgCTggAgCTTTTCTA        | 20     | 59.97 |
| 1                                           | Hsp26-6b | ATCCACAAGCgAAAgCAGAg        | 20     | 60.54 |
| 1                                           | Hsp27-1  | AAgTgACgCTggATCATTCC        | 20     | 60.08 |
| 1                                           | Hsp27-2  | ACACCTggAAgCCATCTTTg (N) 10 | 30     |       |
| 1                                           | Hsp27-3  | CTCCTCTCgTACggCgAATA        | 20     | 60.37 |
| 1                                           | Hsp27-4  | CAGggTgTTgggCAgTAgCA        | 20     | 61.67 |
| 1                                           | Hsp27-5  | CCAgTCggTgCggTAgTCAT        | 20     | 59.72 |
| 1                                           | Hsp27-6  | gggCAGCAgAgCgTTTggAC        | 20     | 60.72 |
| 1                                           | Hsp27-7  | TTgAACTgCgACACATCCAT        | 20     | 60.12 |

|   |            |                              |    |        |
|---|------------|------------------------------|----|--------|
| 1 | Hsp68_1    | CTgTTggCTCgTTgATgATg         | 20 | 60.26  |
| 1 | Hsp68_2    | gAACggCCAgtgCTTAATgT (N) 10  | 25 |        |
| 1 | Hsp68_3    | CTTgAACTCCACgCTTATCT         | 20 | 54.70  |
| 1 | Hsp68_4    | ATCTTggAATCgTCgAAACg         | 20 | 60.07  |
| 1 | Hsp68_5    | ggCTggCATCTTggCTATTT         | 20 | 61.46  |
| 1 | Hsp68_6    | ATCTTTggTTTgCCgTTgTC         | 20 | 59.98  |
|   |            |                              |    |        |
| 1 | Hsp70Ab_1  | CTCCTCgggggCAAATCTCT         | 20 | 63.02  |
| 1 | Hsp70Ab_2  | TCTTggggTCgTCgTATTTT (N) 10  | 30 |        |
| 1 | Hsp70Ab_3a | CgTCgCTTACCACCTTgAAA         | 20 | 61.18  |
| 1 | Hsp70Ab_3b | CACTgTgTTTCTggggTTCA         | 20 | 59.57  |
| 1 | Hsp70Ab_4  | ACTgTgTTTCTggggTTCAT         | 20 | 56.9*  |
| 1 | Hsp70Ab_5  | AgACACCCACgCaggAgTAG         | 20 | 60.32  |
| 1 | Hsp70Ab_6  | TCATgTCCTCTgCgATCTTg         | 20 | 59.94  |
|   |            |                              |    |        |
| 1 | Hsp83-1a   | CTTCCTgATTgACgCTTTAC         | 20 | 55.12* |
| 1 | Hsp83-1b   | TCAATTTgATgCCCAATgAA         | 20 | 59.87  |
| 1 | Hsp83-2    | CCATCCACgAATCCCAGagg (N) 10  | 30 |        |
| 1 | Hsp83-3a   | CgCTTgTTgATgTTgTAGAA         | 20 | 54.95* |
| 1 | Hsp83-3b   | gTTTTgAggCATAgCCgAAg         | 20 | 59.89  |
| 1 | Hsp83-4a   | TAggTgTTgCTgCTTTggAg         | 20 | 59.07  |
| 1 | Hsp83-5a   | ACCCAATCTTTCAACCTCTT         | 20 | 55.29* |
| 1 | Hsp83-5b   | gAAgAgCTTCACCgTTCTgg         | 20 | 59.99  |
| 1 | Hsp83-6    | CTTCgTCggCTTCgTCTTTC         | 20 | 62.33  |
|   |            |                              |    |        |
| 1 | Hsrw-1a    | gCACACATCCTTACATCCTg         | 20 | 56.51* |
| 1 | Hsrw-1b    | AgAAAActgCCTgCTgCATT         | 20 | 60.02  |
| 1 | Hsrw-2     | TTgTTTCCAActCgAgAgCA (N) 10  | 30 |        |
| 1 | Hsrw-3     | CTgACCAGCAAATCgATgA          | 20 | 59.80  |
| 1 | Hsrw-4     | AAATACTACgTgggCCCTTg         | 20 | 58.97  |
| 1 | Hsrw-5     | ACTCgTACTgCTgCTgCTCg         | 20 | 61.89  |
| 1 | Hsrw-6     | ACATCTTTTCCAgggggTTT         | 20 | 59.67  |
| 1 | Hsrw-7a    | gggACACgATTTTACACTT          | 20 | 54.22* |
| 1 | Hsrw-7b    | CTgCTgggACACgATTTTTA         | 20 | 58.77  |
|   |            |                              |    |        |
| 1 | DnaJ-1-1   | AgCACCTTCTCCTCCTTgTA         | 20 | 56.57  |
| 1 | DnaJ-1-2   | CCCTTCAATCCATCCTCACC (N) 10  | 30 |        |
| 1 | DnaJ-1-3   | ATgCATCCCTTgTCCACTTC         | 20 | 59.93  |
| 1 | DnaJ-1-4   | CCTgTgggCTCTTgTTCTTg         | 20 | 60.82  |
| 1 | DnaJ-1-5a  | gAgTgCCAgTTTgCggTAgg         | 20 | 63.05* |
| 1 | DnaJ-1-5b  | AgTTTgCggTAggCCTTCTT         | 20 | 60.26  |
| 1 | DnaJ-1-6   | CCAAgAACTgggCAAATgT          | 20 | 59.97  |
| 1 | DnaJ-1-7   | ATCgCCgTggAACTggTAAg         | 20 | 62.33  |
|   |            |                              |    |        |
| 1 | DnaJ_60-1  | CggCTTTATCagggTCTTgT         | 20 | 59.19  |
| 1 | DnaJ_60-2  | gAAAagggCAgggTTTAggAg (N) 10 | 30 |        |
| 1 | DnaJ_60-3  | gCCTCggAgATCTgAACAAA         | 20 | 60.34  |
| 1 | DnaJ_60-4  | gAgAgCTggACAAAaggCATT        | 20 | 59.43  |
| 1 | DnaJ_60-5  | ACTTCACgggTgCTgCAAT          | 19 | 61.69  |
| 1 | DnaJ_60-6  | gACACgCagCATTgCTCTTA         | 20 | 60.17  |
| 1 | DnaJ_60-7  | gTTTTCTTggTTTgTCgTTC         | 20 | 54.83  |
|   |            |                              |    |        |
| 1 | DnaJ-1     | CgTggCgTAGTAGTCCTTgg         | 20 | 60.70  |
| 1 | DnaJ-2     | ACAACATgCCgTAACATCCA (N) 10  | 30 |        |

|   |            |                             |    |        |
|---|------------|-----------------------------|----|--------|
| 1 | DnaJ-3     | TggAgAggATTCggTAggAg        | 20 | 59.23  |
| 1 | DnaJ-4     | gTgCgTAGCgAgCgAAAATA        | 20 | 61.41  |
| 1 | DnaJ-5     | ggCgTgAAAgCgAATgAAAT        | 20 | 62.37  |
| 1 | DnaJ-6a    | CTgCCggAACACgAATAAT         | 19 | 58.59  |
| 2 | DnaJ-6b    | gCTgCCggAACACgAATAAT        | 20 | 62.26  |
|   |            |                             |    |        |
| 1 | CG9920-1a  | TATggCAGTgTgAgTggTAG        | 20 | 54.6*  |
| 1 | CG9920-1b  | CggATgAAgTgTgTggAgTg        | 20 | 60.15  |
| 1 | CG9920-2   | CTCCTTgggCACCgACTCCT (N) 10 | 30 |        |
| 1 | CG9920-3   | gCAATTCggAAgCAAAATgA        | 20 | 61.09  |
| 1 | CG9920-4   | ggTggTCTTCACCTCgAAAC        | 20 | 59.55  |
| 1 | CG9920-5   | CCTCgAAACgCTggATTAgA        | 20 | 60.34  |
| 1 | CG9920-6   | AACATACTCgCgCTTgTCgT        | 20 | 60.86  |
| 1 | CG9920-7a  | CCTTAGTTCCACCgTATTTg        | 20 | 54.87* |
| 1 | CG9920-7b  | ggACAAgTgTCCAgCTCCA         | 20 | 60.86  |
|   |            |                             |    |        |
| 1 | Hsp60-1    | ATCTCCTCgggCgTgCTAAC        | 20 | 63.82  |
| 1 | Hsp60-2    | CgCCgTCCTTggTgATTTTg (N) 10 | 30 |        |
| 1 | Hsp60-3    | CgCgACATggTCTTAAggTT        | 20 | 60.13  |
| 1 | Hsp60-4a   | ACgCACATCCTTggCATAgC        | 20 | 63.42* |
| 1 | Hsp60-4b   | AACgCACATCCTTggCATAg        | 20 | 61.05  |
| 1 | Hsp60-5    | CTAATggAggAgCgAgCAA         | 20 | 60.11  |
| 1 | Hsp60-6    | gATCTTCTCgAAgCCCTCCT        | 20 | 59.92  |
| 1 | Hsp60-7    | CgAAACTggCAAACggAACA        | 20 | 64.33  |
|   |            |                             |    |        |
| 1 | Hsp60b_1a  | CggAgAgggTggCTACTTgT        | 20 | 61.60  |
| 1 | Hsp60b_2a  | ggATTAgCCCCATggTAAT (N) 10  | 30 |        |
| 1 | Hsp60b_3a  | ACACCTCgACgAATCTCCAC        | 20 | 60.12  |
| 1 | Hsp60b_4a  | CgTATTATCggCCACATCCT        | 20 | 59.81  |
| 1 | Hsp60b_5a  | ggTCACAgCAACggCATCAg        | 20 | 65.17  |
|   |            |                             |    |        |
| 1 | Hsp60b_1b  | TgAATCCTTCCTTggCAATC        | 20 | 60.01  |
| 1 | Hsp60b_2b  | gTCgCTCCACgATCACACT (N) 10  | 29 |        |
| 1 | Hsp60b_3b  | CgTATTATCggCCACATCCT        | 20 | 59.81  |
| 1 | Hsp60b_4b  | ACggCATCAgCCAgAATATC        | 20 | 60.07  |
| 1 | Hsp60b_5b  | ggATCATCATTgCCCgTACT        | 20 | 59.78  |
| 1 | Hsp60b_6b  | CATgTgCTggTCCTTTAggg        | 20 | 60.51  |
| 1 | Hsp60b_7b  | gCgAAACAgCgACTAgAggT        | 20 | 59.64  |
|   |            |                             |    |        |
| 1 | Hsc70_2-1  | CATCTTggCATCgCTCAgTg        | 20 | 62.94  |
| 1 | Hsc70_2-2  | gCTCTggCATTTCCCTTgAT (N) 10 | 30 |        |
| 1 | Hsc70_2-3  | ggAAgAggTCCATgTTCAGC        | 20 | 59.66  |
| 1 | Hsc70_2-4  | AAATCCTCACCACCCAAATg        | 20 | 59.65  |
| 1 | Hsc70_2-5a | AggTgCCgCCgCCCAAgTC         | 19 | 72.16* |
| 1 | Hsc70_2-5b | CTTCACCTCgAACAgggAAC        | 20 | 59.70  |
| 1 | Hsc70_2-6  | ggCATCAATCTCCAAGgATg        | 20 | 60.43  |
| 1 | Hsc70_2-7  | CCTTgCCACCCAgATAgACC        | 20 | 61.80  |
|   |            |                             |    |        |
| 1 | Hsc70_3-1a | TggCTgTTCggTgggTgACT        | 20 | 66.31  |
| 1 | Hsc70_3-1b | ATgAggAgACTggCTgTTCg        | 20 | 60.41  |
| 1 | Hsc70_3-2  | CgAACATCTggACgAAATCT (N) 10 | 30 |        |
| 1 | Hsc70_3-3  | TgCggCTATCgTTTgCTATg        | 20 | 62.17  |
| 1 | Hsc70_3-4  | CgTACgTggTTAATCgTCTgC       | 21 | 60.57  |
| 1 | Hsc70_3-5  | ggCgATCCATCTgAAATTgT        | 20 | 59.90  |

|   |            |                             |    |        |
|---|------------|-----------------------------|----|--------|
| 1 | Hsc70_3-6a | CTCgTCCACCACCCAActgA        | 20 | 64.52* |
| 1 | Hsc70_3-6b | CAGCTgAgCgATgACATTCT        | 20 | 59.14  |
| 1 | Hsc70_3-7a | CTgTCCATTTgCggggTgAg        | 20 | 66.08  |
| 1 | Hsc70_3-7b | ACTCAAgTgCCAggATACgg        | 20 | 60.13  |
|   |            |                             |    |        |
| 1 | Hsc70_4-1a | TTgACTACCACTCgCATCTT        | 20 | 55.92  |
| 1 | Hsc70_4-1b | TCTTGATGCCATCCTCGAAT        | 20 | 60.57  |
| 1 | Hsc70_4-2  | TTCTCgTTgACATCCTCCA (N) 10  | 30 |        |
| 1 | Hsc70_4-3  | CCCATTTCCggAggTCTg          | 18 | 61.43  |
| 1 | Hsc70_4-4a | ATCCgAAgTTTTgCTAAgAA        | 20 | 54.39* |
| 1 | Hsc70_4-4b | TCGACGCTTCAAAGATTGTG        | 20 | 59.99  |
| 1 | Hsc70_4-5  | gCTgTTggATgCCCTTgTTT        | 20 | 62.33  |
| 1 | Hsc70_4-6  | CgCCAACgTTTTgAATACTT        | 20 | 60.26  |
| 1 | Hsc70_4-7  | CTgAAggTCCCCgAgTATCC        | 20 | 60.84  |
|   |            |                             |    |        |
| 1 | Hsc70_5-1  | ATCCAgCCCTTgTTgAgCAg        | 20 | 62.66  |
| 1 | Hsc70_5-2  | CTCCTCCCgAATCTCATCC (N) 10  | 30 |        |
| 1 | Hsc70_5-3  | ACCATTgCCATTggATgAgT        | 20 | 60.20  |
| 1 | Hsc70_5-4  | gTAGTCCCTTCTCgCCAACC        | 20 | 61.02  |
| 1 | Hsc70_5-5a | ATCTCAgCCATTTTCTTgC         | 19 | 55.43* |
| 1 | Hsc70_5-5b | TGTTGGGGATCAGAGAGGAC        | 20 | 60.05  |
| 1 | Hsc70_5-6  | AAgATCTCCgTggCATTCAC        | 20 | 60.08  |
| 1 | Hsc70_5-7  | gATTgTCCgCTgCTgTAGA         | 20 | 61.35  |
|   |            |                             |    |        |
| 1 | Hsp67Ba-1a | TCTTgACggTCAgTTCgTTg        | 20 | 59.87  |
| 1 | Hsp67Ba-2a | CACgATTgTACggATgATgg (N) 10 | 30 |        |
| 1 | Hsp67Ba-3a | CCACggAgTAGgCggATTTg        | 20 | 64.93  |
| 1 | Hsp67Ba-4a | CCgCCgACTgACCCTTgATg        | 20 | 68.39  |
| 1 | Hsp67Ba-5a | ATTgAAATCgTgCAgCTCCT        | 20 | 59.84  |
|   |            |                             |    |        |
| 1 | Hsp67Ba-1b | CAATTCCTTTTCCAGCTCCA        | 20 | 60.18  |
| 1 | Hsp67Ba-2b | AGCTGTGGCAACTGTGAGGT (N) 10 | 30 | 60.93  |
| 1 | Hsp67Ba-3b | CACGATTGTACGGATGATGG        | 20 | 59.80  |
| 1 | Hsp67Ba-4b | CCAGTGGATACAACCCGAAT        | 20 | 59.67  |
| 1 | Hsp67Ba-5b | ATTGAAATCGTGCAGCTCCT        | 20 | 59.84  |
| 1 | Hsp67Ba-6b | CCGACTGACCCTTGATGG          | 18 | 60.04  |
