# Supplementary material
Source: PubMed Central journal article supplement (PMC1630442)
Supplement: pgen.0020165.st003.pdf [file pgen.0020165.st003.pdf]

| <b>Table S3: UFW Primers for Gene Set II</b> |           |                             |                |            |
|----------------------------------------------|-----------|-----------------------------|----------------|------------|
| SET                                          | Primer    | Sequence 5'-3'              | Length<br>[bp] | Tm<br>[°C] |
| 2                                            | gapdh1_1a | TCCgTTAATTCCgATCTTCg        | 20             | 60.03      |
| 2                                            | gapdh1_2a | ACTgCCgCTTTTTCCTTTTC (N) 10 | 30             |            |
| 2                                            | gapdh1_3a | TggCTgAgTTCCTgCTgTCT        | 20             | 61.15      |
| 2                                            | gapdh1_4a | AAATTAggAgAATggCgCTg        | 20             | 59.32      |
| 2                                            | gapdh1_5a | ggggAgggTTgATgAgTATT        | 20             | 57.77      |
| 2                                            | gapdh1_1b | gTgAACACTCCggTggACTC        | 20             | 60.57      |
| 2                                            | gapdh1_2b | CCgTgAgTCgAgTCgAATTT (N) 10 | 30             |            |
| 2                                            | gapdh1_3b | ACATACTCggCTCCAgCACT        | 20             | 59.90      |
| 2                                            | gapdh1_4b | gACATCgATgAAgggATCgT        | 20             | 59.89      |
| 2                                            | gapdh1_5b | TCCgTTAATTCCgATCTTCg        | 20             | 60.03      |
| 2                                            | gapdh1_6b | TgAACACggTgATCTTCTgg        | 20             | 59.68      |
| 2                                            | gapdh2-1  | gCCAgAggAgCCAAgCAgTT        | 20             | 64.19      |
| 2                                            | gapdh2-2  | gTgATCTTCTggCCgTTgAC (N) 10 | 30             |            |
| 2                                            | gapdh2-3  | TCAAgtgAgTggATgCCTTg        | 20             | 59.83      |
| 2                                            | gapdh2-4  | gggTCgAATCgAACTTgAAC        | 20             | 59.53      |
| 2                                            | gapdh2-5  | AgTTCACATCgATgAAgggA        | 20             | 58.07      |
| 2                                            | gapdh2-6  | TggACTCCACgATgTATTCg        | 20             | 59.52      |
| 2                                            | gapdh2-7  | gATgCgACCAAATCCATTg         | 19             | 59.87      |
| 2                                            | βTub56D-1 | AggTCACCgTATgTgggTgT        | 20             | 60.16      |
| 2                                            | βTub56D-2 | CATgATCCTgTCggggTACT (N) 10 | 30             |            |
| 2                                            | βTub56D-3 | TgTCgATgCAGTAggTCTCg        | 20             | 60.01      |
| 2                                            | βTub56D-4 | CggATCTTggAAATCAgCAg        | 20             | 60.73      |
| 2                                            | βTub56D-5 | TgTgTgAgTTggAAgCCTTg        | 20             | 59.87      |
| 2                                            | βTub56D-6 | gACggCACAACCgAgTATg         | 19             | 60.13      |
| 2                                            | D-Myc-1a  | gTCCTggTTgTTCCgCTTgC        | 20             | 65.26*     |
| 2                                            | D-Myc-1b  | gggCggTATTAATggACCT         | 20             | 60.04      |
| 2                                            | D-Myc-2   | TgTTgATTTgACTgggTgTT (N) 10 | 30             |            |
| 2                                            | D-Myc-3   | CgCTTCTgACAgACCgTgTA        | 20             | 60.05      |
| 2                                            | D-Myc-4a  | CgCTgTAGAgATTCgTAGAg        | 20             | 52.95*     |
| 2                                            | D-Myc-4b  | TCgTCTgCgATCgTTgATAC        | 20             | 59.83      |
| 2                                            | D-Myc-5a  | CCgCTCTCTATTCCATTACC        | 20             | 56.41*     |
| 2                                            | D-Myc-5b  | TgCACTgTTTCCgCTCTCTA        | 20             | 59.74      |
| 2                                            | D-Myc-6   | CAgATCTgCgAgCTCCTTCT        | 20             | 59.85      |
| 2                                            | D-Myc-7   | AATggTggACgACgAAAggA        | 20             | 62.76      |
| 2                                            | Adh-1     | gggCACggTCACATCATAgg        | 20             | 63.63      |
| 2                                            | Adh-2     | ACCAATgCCTCCAgACC (N) 10    | 28             |            |
| 2                                            | Adh-3     | CggTCACCTTTggATTgATT        | 20             | 59.79      |
| 2                                            | Adh-4     | TCACgTTCTTgTTggTCAAAG       | 21             | 58.81      |
| 2                                            | Adh-5     | TTAgCAggCTCTTTCgATCTg       | 21             | 59.74      |
| 2                                            | Adh-6     | ggTCgAggATCACCaggTT         | 19             | 59.91      |
| 2                                            | Adh-7     | ggAAgAgggCTCCgTTAgTT        | 20             | 59.71      |
| 2                                            | Sgs4_1a   | CATCTCggTggTTCggTTTC        | 20             | 62.67      |

|   |          |                             |    |        |
|---|----------|-----------------------------|----|--------|
| 2 | Sgs4_1b  | CATCTTggTggTTCggTTTC        | 20 | 60.35  |
| 2 | Sgs4_2   | CCAATAACACAACCAACAAC (N) 10 | 30 |        |
| 2 | Sgs4_3a  | TCggTggTTCAgTTTTACAg        | 20 | 56.27* |
| 2 | Sgs4_3b  | TCggTggTTCAgTTTTACAgC       | 21 | 60.16  |
| 2 | Sgs4_4   | ACTCCAAGCgCATCTTgACT        | 20 | 60.02  |
| 2 | Sgs4_5   | CATTTTgCCATCgACACATC        | 20 | 59.93  |
| 2 | Sgs4_6   | gTAgAACCTgACggggCAAg        | 20 | 61.96  |
|   |          |                             |    |        |
| 2 | Su(s)-1  | AgCgATATgCggCAAgTAgT        | 20 | 59.90  |
| 2 | Su(s)-2  | TAggTggCATCCgAgTggT (N) 10  | 30 |        |
| 2 | Su(s)-3  | TCCACgAgATgTCTTCTCCA        | 20 | 59.34  |
| 2 | Su(s)-4a | ATAAAGCAGAAAGCAGAgg         | 19 | 52.41* |
| 2 | Su(s)-4b | gTCgCCATAAAgCAGAAAGC        | 20 | 59.99  |
| 2 | Su(s)-5  | TTTgggCAAAGTTCATgTCA        | 20 | 60.09  |
| 2 | Su(s)-6  | CACTTTgCgggAAgTCTgAT        | 20 | 60.25  |
| 2 | Su(s)-7  | CgATAAATTgCACTCgCTgA        | 20 | 59.98  |
|   |          |                             |    |        |
| 2 | Act5C-1  | ggTCATCTTCTCACggTTgg        | 20 | 60.51  |
| 2 | Act5C-2  | CAGTTggTCACgATACCgTg (N) 10 | 30 |        |
| 2 | Act5C-3  | CACACgCAGCTCATTgTAga        | 20 | 58.60  |
| 2 | Act5C-4  | AggATACCACgCTTgCTCTg        | 20 | 60.42  |
| 2 | Act5C-5  | CACAATCgATgggAAgACg         | 19 | 60.06  |
| 2 | Act5C-6  | AggTgTggTgCCAgATCTTC        | 20 | 60.12  |
| 2 | Act5C-7  | gAgCAGCAACTTCTTCgTCA        | 20 | 59.32  |
|   |          |                             |    |        |
| 2 | NinaE_1a | TTggTggTggCgAATATgTA        | 20 | 59.81  |
| 2 | NinaE_2a | AggAAATCATgCCgATCATg (N) 10 | 30 |        |
| 2 | NinaE_3a | CCACgCCATTTCCgCACCAG        | 20 | 71.16* |
| 2 | NinaE_4a | CATgTAggCggTCAggATCT        | 20 | 60.10  |
| 2 | NinaE_5a | TACTgCAAAGCTgCAACACC        | 20 | 60.06  |
|   |          |                             |    |        |
| 2 | NinaE_1b | ATCATgggCgTgTTTgTgAT        | 20 | 61.20  |
| 2 | NinaE_2b | CATgTAggCggTCAggATCT (N) 10 | 30 |        |
| 2 | NinaE_3b | gAgATggCCAggTTgATgAC        | 20 | 60.48  |
| 2 | NinaE_4b | ggTTCCAgtACgggCTgAT         | 19 | 59.94  |
| 2 | NinaE_5b | CTTgTCCACCACCgATCC          | 18 | 59.88  |
| 2 | NinaE_6b | TTggTggTggCgAATATgTA        | 20 | 59.81  |
|   |          |                             |    |        |
| 2 | RpL32_1  | gACAATCTCCTTgCgCTTCT        | 20 | 59.58  |
| 2 | RpL32_2  | gTTCgATCCgTAACCgATgT (N) 10 | 30 |        |
| 2 | RpL32_3  | ACgTTgTgCACCaggAACTT        | 20 | 60.61  |
| 2 | RpL32_4a | CTggTggCggATgAAgTgCT        | 20 | 65.89  |
| 2 | RpL32_4b | AgCATATCgATCCgACTggT        | 20 | 59.54  |
| 2 | RpL32_5a | CTgTATgCTgggCggATggT        | 20 | 65.48  |
| 2 | RpL32_5b | TCACgATCTTgggCCTgTAT        | 20 | 60.48  |
| 2 | RpL32_6  | CTCTgTTgTCgATACCCTTgg       | 21 | 60.61  |
|   |          |                             |    |        |
| 2 | Elf-1a   | ATTTTgTCCgAggggTTgAg        | 20 | 61.24  |
| 2 | Elf-2a   | TgCAGTTggAggCggTggAg (N) 10 | 30 |        |
| 2 | Elf-3a   | CATCgATgggCgTTggAT          | 18 | 62.88  |
| 2 | Elf-4a   | CgACggAATCgggTgTgg          | 18 | 65.93  |
| 2 | Elf-5a   | TggTggCTggCgTggCTgAA        | 20 | 72.75  |
| 2 | Elf-6a   | ggAATTggAggATgATgTgg        | 20 | 60.13  |
| 2 | Elf-7a   | ACTACTgCCgCCgCCTCCTC        | 20 | 68.24  |

|   |                    |                               |    |        |
|---|--------------------|-------------------------------|----|--------|
| 2 | Elf-1b             | gCTgTgCTgAgggTgCTg            | 18 | 61.85  |
| 2 | Elf-2b             | CCgCCTCCTCAgCTACATT           | 19 |        |
| 2 | Elf-3b             | gACggAATCgggTgTggT            | 18 | 61.81  |
| 2 | Elf-4b             | ACTgggCACAAATTCTACCg          | 20 | 59.99  |
| 2 | Elf-5b             | TCACgTTCAgCgTTgAgAAC          | 20 | 60.03  |
| 2 | Elf-6b             | AgCCgCTgCAACCACTACT           | 19 | 61.01  |
|   |                    |                               |    |        |
| 2 | CG31061-1a         | CCACCgATgAAAgCagAgCA          | 20 | 64.73  |
| 2 | CG31061-1b         | CCCggTgTACCgATAATgAC          | 20 | 60.07  |
| 2 | CG31061-2          | AgATTAgAgTTTTgCCAgtT (N) 10   | 30 |        |
| 2 | CG31061-3          | CCgAAACgATTTgCagAgAT          | 20 | 60.21  |
| 2 | CG31061-4          | CAGCTgCCTgAATCTTCgTT          | 20 | 60.54  |
| 2 | CG31061-5          | AgACgCagTTCCTCgAAggT          | 20 | 61.36  |
| 2 | CG31061-6          | CATgCggTTgTgTTTATgTTg         | 20 | 59.85  |
| 2 | CG31061-7          | CACATCgCTACTTCgTTCCCT         | 20 | 57.98  |
|   |                    |                               |    |        |
| 2 | CG13340-1          | TTgAAgCCgATgCCCTCCAgt         | 20 | 60.29  |
| 2 | CG13340-2          | gACgCgCTggTCAATCTT (N) 10     | 28 |        |
| 2 | CG13340-3          | CgATgTTgTggAACACCTTg          | 20 | 60.00  |
| 2 | CG13340-4a         | CgCCCTTCgCCATCgTCTTg          | 20 | 70.38* |
| 2 | CG13340-4b         | gAgTCagCTTgggATCCTTg          | 20 | 59.80  |
| 2 | CG13340-5a         | gCCATCgCCgCAggAgAATC          | 20 | 69.56* |
| 2 | CG13340-5b         | gAgAATCTCACgCCAgCACT          | 20 | 59.52  |
| 2 | CG13340-6a         | TCACAgATCgCCTTCATCAgt         | 20 | 59.94  |
| 2 | CG13340-6b         | ACAgtATCgCCTTCATCAgtCT        | 20 | 59.98  |
| 2 | CG13340-7          | CACACgCATTTTTCAACgAg          | 20 | 60.29  |
|   |                    |                               |    |        |
| 2 | CG4750-1           | TCgTCCAgtTCCTCgTTTTTC         | 20 | 60.23  |
| 2 | CG4750-2           | CAGAgCATCATCCAAGgTCA (N) 10   | 30 |        |
| 2 | CG4750-3           | CAGACCCTTTCgggAgT             | 18 | 60.04  |
| 2 | CG4750-4           | gCTTATCgCCATCCTTggTA          | 20 | 60.06  |
| 2 | CG4750-5           | CACAACACCCTTgggACTCT          | 20 | 60.00  |
| 2 | CG4750-6           | gTTCACggATCAgggTCAAC          | 20 | 60.37  |
| 2 | CG4750-7           | gATTgTCCAgtAACgATTTTg         | 20 | 55.64  |
|   |                    |                               |    |        |
| 2 | $\alpha$ Tub84D-1a | AACgAgTggAAgtAgAggAA          | 20 | 57.29  |
| 2 | $\alpha$ Tub84D-1b | ggCCACgTggATAgAgATA           | 20 | 59.92  |
| 2 | $\alpha$ Tub84D-2  | AgCTCCAgtTCTCgCTgAAgtA (N) 10 | 30 |        |
| 2 | $\alpha$ Tub84D-3  | ggTggAACAgCTgACggTA           | 19 | 59.69  |
| 2 | $\alpha$ Tub84D-4  | ggTgTTAAACgAgTCATCACCT        | 22 | 58.11  |
| 2 | $\alpha$ Tub84D-5a | TCTTgTCggAgggCATCTgg          | 20 | 65.87* |
| 2 | $\alpha$ Tub84D-5b | gTCTTgTCggAgggCATCT           | 19 | 60.22  |
| 2 | $\alpha$ Tub84D-6  | gTTCCAgtTACggACCTCgTC         | 20 | 59.58  |
| 2 | $\alpha$ Tub84D-7  | CTCCAgtCAggCATTTCCAA          | 20 | 65.67  |
|   |                    |                               |    |        |
| 2 | $\alpha$ Tub84B_1a | CTCgCTgAAgtAggTgTTgA          | 20 | 59.16  |
| 2 | $\alpha$ Tub84B_2a | CCAgCAggCgTTTCCAATCT (N) 10   | 30 |        |
| 2 | $\alpha$ Tub84B_3a | CCAgtCAgtAgAgCTCCAgt          | 20 | 60.15  |
| 2 | $\alpha$ Tub84B_4a | gATgAggAggAAgggAAAAC          | 20 | 57.62  |
| 2 | $\alpha$ Tub84B_5a | TTACACACCCCAgtAAAATCg         | 21 | 59.85  |

|   |                    |                           |    |        |
|---|--------------------|---------------------------|----|--------|
| 2 | $\alpha$ Tub84B_1b | CCgCATCCTCCTTACCAgT       | 19 | 60.08  |
| 2 | $\alpha$ Tub84B_2b | CCAgTCTCgCTgAAgAAggT(N)10 | 30 |        |
| 2 | $\alpha$ Tub84B_3b | gTggAACAgCTgACggTAgg      | 20 | 60.71  |
| 2 | $\alpha$ Tub84B_4b | AgCAgTAgAgCTCCCAgCAg      | 20 | 59.91  |
| 2 | $\alpha$ Tub84B_5b | AATCTggACACCAgCCTgAC      | 20 | 60.12  |
| 2 | $\alpha$ Tub84B_6b | gACCACAgTgggTTCCAgAT      | 20 | 59.82  |
|   |                    |                           |    |        |
| 2 | Ef2b_1a            | ATCCTTTTCCTCCACCTCAA      | 20 | 58.57  |
| 2 | Ef2b_2a            | AAgggAATCggTCAgAgTgg(N)10 | 30 |        |
| 2 | Ef2b_3a            | TCgTCCTTgCgggTgTCAgT      | 20 | 66.43* |
| 2 | Ef2b_4a            | TCTACgTgggCAATCACAgA      | 20 | 60.26  |
| 2 | Ef2b_5a            | gATgTTCCgCTTCTTgTCCA      | 20 | 61.19  |
|   |                    |                           |    |        |
| 2 | Ef2b_1b            | CACCAgATCCTTTTCCTCCA      | 20 | 60.04  |
| 2 | Ef2b_2b            | TgATACCAgCCTTCgACACA(N)10 | 30 |        |
| 2 | Ef2b_3b            | ggTAATgCAgCgCTCCTg        | 18 | 60.53  |
| 2 | Ef2b_4b            | CAgACATgTTgCggATgTTC      | 20 | 60.12  |
| 2 | Ef2b_5b            | gATCTCgTCgACggTgAAgT      | 20 | 60.27  |
| 2 | Ef2b_6b            | AACgAgTCTCACCAgCCTTg      | 20 | 60.44  |
|   |                    |                           |    |        |
| 2 | cup-1              | CAgCTTgAggTAgCCCAgTC      | 20 | 60.01  |
| 2 | cup-2              | TggAgTTggTggCggTggAg(N)10 | 30 |        |
| 2 | cup-3              | TCCTCCCACCTTCTCggAgTT     | 20 | 61.16  |
| 2 | cup-4              | ACTCgAACTTgCCCTTCTCA      | 20 | 59.99  |
| 2 | cup-5              | AgCACCTCATCCTgCTgATC      | 20 | 60.38  |
| 2 | cup-6              | gTCgTCATgCTCTTgACTgg      | 20 | 59.42  |
| 2 | cup-7              | AATTCgATCgCCTCCTCTTT      | 20 | 60.17  |
