# Supplementary material
Source: PubMed Central journal article supplement (PMC1630442)
Supplement: pgen.0020165.st004.pdf [file pgen.0020165.st004.pdf]

**Table S4: UFW Primers for Gene Set III**

| SET | Primer     | Sequence 5'-3'              | Length<br>[bp] | Tm<br>[°C] |
|-----|------------|-----------------------------|----------------|------------|
| 3   | CG7906_1a  | gCCAATCCACAggTCCACTC        | 20             | 62.88      |
| 3   | CG7906_1b  | AAACCTggAgTggAccTgTg        | 20             | 60.00      |
| 3   | CG7906_2   | gCTCCgTTTgCTgTggTTTC (N) 10 | 30             |            |
| 3   | CG7906_3a  | ggTTTgTTCTTTATgTgCTg        | 20             | 53.39*     |
| 3   | CG7906_3b  | ggTTTgTTCTTTATgTgCTggA      | 22             | 59.13      |
| 3   | CG7906_4   | TAgTTgCggCTTCCgTAgTC        | 20             | 60.41      |
| 3   | CG7906_5   | CgACAggATggCTAggAAAT        | 20             | 59.15      |
| 3   | CG7906_6   | ggCTggTTATCAggTTCTgg        | 20             | 59.55      |
| 3   | CG7924-1a  | CTgggCATTACAACAACCTgg       | 20             | 59.05      |
| 3   | CG7924-2a  | TTAgggATgCCAggATTTgg (N) 10 | 30             |            |
| 3   | CG7924-3a  | gTgATTgggAATgCCAggAT        | 20             | 62.03      |
| 3   | CG7924-4a  | CgCACCTTATTATCAgACTT        | 20             | 52.22      |
| 3   | CG7924-5a  | TTCCCgTTCCTggTTggTCA        | 20             | 65.95      |
| 3   | CG7924-6a  | ggTgACAAGATCAgTTTCggA       | 21             | 60.10      |
| 3   | CG7924-1b  | ggTTAgggATgCCAggATTT        | 20             | 60.15      |
| 3   | CG7924-2b  | ATCTCTTCCCgTTCCTggTT (N) 10 | 30             |            |
| 3   | CG7924-3b  | CTTgTCACCCgCACCTTATT        | 20             | 59.99      |
| 3   | CG7924-4b  | AgCAACggCACTTggATAgT        | 20             | 59.76      |
| 3   | CG7924-5b  | gCTgTggTgAAgACgAAACA        | 20             | 59.88      |
| 3   | CG7924-6b  | CTCCTggACAACATggACCT        | 20             | 59.96      |
| 3   | CG15634-1a | ggAACCAGgATAACCgAgTC        | 20             | 58.45      |
| 3   | CG15634-2a | CCACTgTCgTTgCTgATgTT (N) 10 | 30             |            |
| 3   | CG15634-3a | CTgACAACggCTCCACTgTT        | 20             | 61.31      |
| 3   | CG15634-4a | TTggCTTTggTTCTTTTCTA        | 20             | 55.27      |
| 3   | CG15634-5a | CTTgTTTgAATgTCTTgATA        | 20             | 48.54      |
| 3   | CG15634-6a | ATgATggCggATgTgTTTTA        | 20             | 58.85      |
| 3   | CG15634-1b | ATCCgCTgCCAgtATgAgTT        | 20             | 59.72      |
| 3   | CG15634-2b | ATCAAgCCgTCATCgACTTC (N) 10 | 30             |            |
| 3   | CG15634-3b | CATTgACCCggAATTCTACg        | 20             | 60.32      |
| 3   | CG15634-4b | TgACAACggCTCCACTgTT         | 19             | 60.30      |
| 3   | CG15634-5b | CTgTCgTTgCTgATgTTgCT        | 20             | 60.06      |
| 3   | CG15634-6b | ATCgAATggAgAACgCAgAg        | 20             | 60.36      |
| 3   | CG12011-1a | CCCTCCTTCACACCAACCTg        | 20             | 62.86      |
| 3   | CG12011-2a | CCCgCACTTTATTggCAACT (N) 10 | 30             |            |
| 3   | CG12011-3a | AgATTggCCTTgggAgATgA        | 20             | 61.90      |
| 3   | CG12011-4a | gggTTTgATTTCTTgAggTg        | 20             | 57.08      |
| 3   | CG12011-5a | CCATCAgAACACCAAgAAgA        | 20             | 56.18      |
| 3   | CG12011-6a | ACCTCCACgTTgggTTTgAT        | 20             | 61.57      |
| 3   | CG12011-1b | TCTTgACCCTCCTTCACACC        | 20             | 60.09      |
| 3   | CG12011-2b | CTCCACgTTgggTTTgATTT        | 30             |            |
| 3   | CG12011-3b | gAAgATTggCCTTgggAgAT        | 20             | 60.41      |
| 3   | CG12011-4b | CggAgCCTTgTCCTgTTCTA        | 20             | 60.39      |
| 3   | CG12011-5b | CCAAgAAgAACCAggAgTCg        | 20             | 59.84      |

|   |            |                             |    |       |
|---|------------|-----------------------------|----|-------|
| 3 | CG12011-6b | CCgCACTTTATTggCAACTT        | 20 | 60.13 |
| 3 | CG4818-1   | TCCTTgggTgATTCCgTCTA        | 20 | 60.45 |
| 3 | CG4818-2   | TggTTCCgAATAgCCATAgg (N) 10 | 30 |       |
| 3 | CG4818-3a  | TgCgggTCTCCTgTTTgCTg        | 20 | 66.97 |
| 3 | CG4818-3b  | ggTCTCCTgTTTgCTggACA        | 20 | 61.26 |
| 3 | CG4818-4   | CTgACCCAACCTCATCCTTgg       | 20 | 60.50 |
| 3 | CG4818-5   | ggTTgggCAGTggAAgATTg        | 20 | 62.76 |
| 3 | CG4818-6   | ggTCTCCTgTTTgCTggACA        | 20 | 61.26 |
| 3 | Sep5-1a    | ggTTgTgCgggCTCggTgTA        | 20 | 68.70 |
| 3 | Sep5-1b    | TTgCCTTCAGCTTCACATTg        | 20 | 59.99 |
| 3 | Sep5-2     | ggAgCCTggggACTTTggTT (N) 10 | 30 |       |
| 3 | Sep5-3     | AgAgTggATTTCCCgAgAg         | 19 | 56.79 |
| 3 | Sep5-4     | CACCTCCTgCgTCTTCTTTT        | 20 | 59.47 |
| 3 | Sep5-5     | TTTCgCCAgTgCTTTCgTTA        | 20 | 61.81 |
| 3 | Sep5-6     | TTCTggACgCTCTTgTTgAC        | 20 | 59.01 |
| 3 | CG10591-1  | gCggTCCTggTAAgCCTCTA        | 20 | 61.65 |
| 3 | CG10591-2  | gTTCTgATTgCCAggAggTC (N) 10 | 30 |       |
| 3 | CG10591-3  | AAggACCTgTgggTggATAg        | 20 | 58.87 |
| 3 | CG10591-4  | gACCTggAggTCCTCgTTC         | 19 | 59.63 |
| 3 | CG10591-5  | CAAgAgCATTTACCAACgA         | 20 | 59.84 |
| 3 | CG10591-6  | CCCAGTAGCCAgAACCACTg        | 20 | 60.70 |
| 3 | CG10591-7  | AAAgCCAAgAgTCCCAAAAA        | 20 | 58.81 |
| 3 | Lcp1-1a    | CgAgggCTggTATCCgTTCT        | 20 | 63.68 |
| 3 | Lcp1-1b    | ggCTggTATCCgTTCTCATT        | 20 | 59.01 |
| 3 | Lcp1-2     | CCTgCTCgATTCCgTTgg (N) 10   | 28 |       |
| 3 | Lcp1-3     | CgTACTTAACCTCgACgTgCT       | 21 | 59.46 |
| 3 | Lcp1-4     | ggTgTgCAGgCTggAATC          | 18 | 60.21 |
| 3 | Lcp1-5     | AACATCATCggATTgggAAA        | 20 | 60.13 |
| 3 | Lcp1-6     | gTgAgATCCAgCCgAAgTTg        | 20 | 60.80 |
| 3 | Lcp1-7     | AAggACATCggCgTggACAT        | 20 | 58.81 |
| 3 | Cg2961-1   | CCATAggATCCgTgACCACT        | 20 | 59.80 |
| 3 | Cg2961-2   | CCTCCCTgggCATATgAAT (N) 10  | 29 |       |
| 3 | Cg2961-3   | CCTgCAGaATgACCTTgATg        | 20 | 59.24 |
| 3 | Cg2961-4   | gCCACCACCACCACCAC           | 17 | 62.02 |
| 3 | Cg2961-5   | ggCgTggCTATCACATTgTA        | 20 | 59.57 |
| 3 | Cg2961-6   | gCgCATACCCATgACCTC          | 18 | 60.04 |
| 3 | Cg2961-7   | gCTACCTCCTCCTCCTCCAC        | 20 | 60.22 |
| 3 | slam-1a    | TCCTCCCTggTCATCgTAgC        | 20 | 62.51 |
| 3 | slam-1b    | CTCCCTggTCATCgTAgCTC        | 20 | 59.83 |
| 3 | slam-2     | TTgTgCTTggACTggTTgTT (N) 10 | 30 |       |
| 3 | slam-3     | CgCTgAgATCATCACTgTTCA       | 21 | 60.00 |
| 3 | slam-4     | CgTggAATTgCTTAggACCA        | 20 | 61.02 |
| 3 | slam-5     | TTTgCTgTCTTgTTgTTgACg       | 21 | 59.94 |
| 3 | slam-6     | CTgCCgTgTCCACTACCAT         | 19 | 59.56 |
| 3 | slam-7     | TTgTAACTgTggCTTTCTgg        | 20 | 56.43 |
| 3 | BcDNA-1    | gTggCTgAAgTggTggTATC        | 20 | 58.00 |
| 3 | BcDNA-2    | CCTTCAGACAAACgACAAAT (N) 10 | 30 |       |

|   |            |                             |    |       |
|---|------------|-----------------------------|----|-------|
| 3 | BcDNA-3    | CACTCCTCAgCACAgCAATC        | 20 | 59.58 |
| 3 | BcDNA-4    | TgATTTTggCACACATTCgT        | 20 | 59.97 |
| 3 | BcDNA-5    | TAAgCAgCAgAACggTCCAg        | 20 | 61.50 |
| 3 | BcDNA-6    | gCTACCgATAATggAAACCTCT      | 22 | 58.67 |
| 3 | Srp54-1    | CAACgggCATACTTCACCTC        | 20 | 60.52 |
| 3 | Srp54-2    | ggCAgCTgTCCCTCgAT (N)10     | 27 |       |
| 3 | Srp54-3    | CCgCCTCgTTCTTAACAT          | 20 | 60.13 |
| 3 | Srp54-4    | gTTAATgACTTCgggCggTA        | 20 | 59.96 |
| 3 | Srp54-5    | TTCCgTTCTTgAgCATCTCC        | 20 | 60.34 |
| 3 | Srp54-6    | ACTTggggTcGTACgTCTTg        | 20 | 60.03 |
| 3 | Srp54-7    | gCCAagAACgggTATgACAAT       | 20 | 59.82 |
| 3 | TH1-1a     | TATggTgTCCgCCTTCTTgg        | 20 | 63.24 |
| 3 | TH1-1b     | ATATggTgTCCgCCTTCTTg        | 20 | 59.96 |
| 3 | TH1-2      | CgACTgAAAgTAgCgCTTCA (N)10  | 30 |       |
| 3 | TH1-3      | CCTTgAgATgATTCTCCACCA       | 21 | 60.06 |
| 3 | TH1-4      | gTAAATATCCCCggCTCCAT        | 20 | 60.01 |
| 3 | TH1-5      | gTgAggAACTTCTCCAggCA        | 20 | 60.39 |
| 3 | TH1-6      | ACCACCgCCTTgTAgTTCTC        | 20 | 59.21 |
| 3 | TH1-7      | CCAgAgTCgTCgTATTCAC         | 20 | 58.16 |
| 3 | Bsg25D-1a  | TCggAgCCCAGgAAgTTgAg        | 20 | 64.98 |
| 3 | Bsg25D-1b  | ggAgCCCAGgAAgTTgAgTA        | 20 | 59.28 |
| 3 | Bsg25D-2   | CCggAgCTCCAgCAgTgA (N)10    | 28 |       |
| 3 | Bsg25D-3   | TTgAACTggCCAAAggACAC        | 20 | 61.08 |
| 3 | Bsg25D-4   | CAgAgCTTCAgCAgggACTT        | 20 | 59.75 |
| 3 | Bsg25D-5   | TCgTCCAagAAgTCCACACTg       | 20 | 59.86 |
| 3 | Bsg25D-6   | gACACgCCCAGCTgATg           | 17 | 59.92 |
| 3 | Bsg25D-7   | gCTgCggAACATTTggTAgA        | 20 | 61.17 |
| 3 | CG10154-1  | gCACACTTggAgAACAggAT        | 20 | 57.71 |
| 3 | CG10154-2  | ggTgAggggCCTAAATgTTCA (N)10 | 30 |       |
| 3 | CG10154-3  | CgATATATTTggAgCAATTTCCA     | 23 | 60.17 |
| 3 | CG10154-4  | TggACCgggAgCTACTACAA        | 20 | 60.65 |
| 3 | CG10154-5  | TCCgATgAACCATCAAAATg        | 20 | 59.33 |
| 3 | CG10154-6  | TAgggCAAATAAACgCCATC        | 20 | 59.93 |
| 3 | CG10154-7a | ATAgTAgTAggAgCCCATTT        | 20 | 49.95 |
| 3 | CG10154-7b | ggAgCCCATTTAATAgCCTT        | 20 | 59.48 |
| 3 | CG7724-1a  | ACCgTTTTgTATTCgTATTC        | 20 | 51.96 |
| 4 | CG7724-1b  | TTTCgCgTACTCgTTAATgg        | 20 | 58.84 |
| 3 | CG7724-2   | ATACATCTACCAgggAgTTT (N)10  | 30 |       |
| 3 | CG7724-3   | AgAgCgCCCAATCCTAATCT        | 20 | 60.19 |
| 3 | CG7724-4   | TTgAATgAgATgCAACgAAAA       | 21 | 59.29 |
| 3 | CG7724-5   | ATTgCCTAAgCACCCCACTA        | 20 | 59.59 |
| 3 | CG7724-6   | TCAACggCCTTTACTTCTCg        | 20 | 60.38 |
| 3 | CG7724-7   | gggAAgAgAAgACAACCTATT       | 20 | 50.08 |
| 3 | CG2070-1   | ACgggCATTCTCgCACTTCT        | 20 | 64.42 |
| 3 | CG2070-2   | CggTCACAATCgCCTTCT (N)10    | 29 |       |
| 3 | CG2070-3   | CAAgCCATgTACACggTAgC        | 20 | 59.22 |
| 3 | CG2070-4   | TCATTCgTTTTcGTggTgAA        | 20 | 60.09 |
| 3 | CG2070-5   | ATAgATTCCgATggCCgAAA        | 20 | 61.65 |

|   |          |                                                                                                   |    |       |
|---|----------|---------------------------------------------------------------------------------------------------|----|-------|
| 3 | CG2070-6 | AgCTCCA <sub>g</sub> AA <sub>C</sub> ggTCTCCTT                                                    | 20 | 60.39 |
| 3 | CG2070-7 | C <sub>Ag</sub> C <sub>g</sub> g <sub>g</sub> C <sub>Ag</sub> AA <sub>C</sub> g <sub>g</sub> TAAT | 20 | 62.46 |
| 3 | CG6296-1 | gC <sub>Ag</sub> C <sub>g</sub> T <sub>g</sub> TAA <sub>g</sub> gT <sub>Ag</sub> AA <sub>g</sub>  | 20 | 55.40 |
| 3 | CG6296-2 | TCC <sub>g</sub> CCTCC <sub>g</sub> CCTTACCAAT (N)10                                              | 30 |       |
| 3 | CG6296-3 | TAACC <sub>g</sub> T <sub>g</sub> TT <sub>g</sub> gT <sub>g</sub> gAC <sub>Ag</sub> A             | 20 | 60.00 |
| 3 | CG6296-4 | TCTT <sub>Ag</sub> gCCACCTTCCCTTT                                                                 | 20 | 60.07 |
| 3 | CG6296-5 | TCTC <sub>g</sub> AA <sub>CC</sub> gAAA <sub>g</sub> TT <sub>g</sub> gTC                          | 20 | 60.23 |
| 3 | CG6296-6 | gCCTCCT <sub>g</sub> AgCCTC <sub>g</sub> T <sub>Ag</sub> TA                                       | 20 | 59.60 |
| 3 | CG6296-7 | C <sub>Ag</sub> CACA <sub>g</sub> AA <sub>g</sub> gCACAATC                                        | 20 | 59.45 |
