# Supplementary material
Source: PubMed Central journal article supplement (PMC1630442)
Supplement: pgen.0020165.st005.pdf [file pgen.0020165.st005.pdf]

| Table S5: Transposable element-specific primers for additional screens |            |                            |             |                      |              |      |
|------------------------------------------------------------------------|------------|----------------------------|-------------|----------------------|--------------|------|
| TE                                                                     | Primer     | Sequence 5' - 3'           | Length [bp] | Tm <sup>a</sup> [°C] |              | Ref. |
| 297                                                                    | 297_L1     | TTgggAgATgTTTCgAgCAC       | 20          | 61.19                |              |      |
| 297                                                                    | 297_R1     | ATCCCAgCCCAAgTATAggC       | 20          | 60.31                |              |      |
| 1360                                                                   | 1360_L1    | ACggTgAAgggCATATTTTg       | 20          | 59.82                |              |      |
| 1360                                                                   | 1360_R1    | gTATggCCgTTACgCATCTT       | 20          | 59.99                |              |      |
| Gypsy                                                                  | gypsy_L1   | CggCTAAATggTATggCAAg       | 20          | 60.47                |              |      |
| Gypsy                                                                  | gypsy_R1   | CATCgTgCgTTCACCACTAC       | 20          | 60.18                |              |      |
| Jockey                                                                 | Jockey_L1  | gggCAAAAACAACACAgCTT       | 20          | 60.15                |              |      |
| Jockey                                                                 | Jockey_R1  | CACCCTCATgACCTCCCTAA       | 20          | 59.92                |              |      |
| roo                                                                    | Roo_L1     | AAAggAgCTggCCTTTCTCT       | 20          | 59.60                |              |      |
| roo                                                                    | Roo_R1     | gCCCATTgAAATCTTAGTTgC      | 21          | 58.71                |              |      |
| I element                                                              | I-1R       | TAAgCCCCgTAgCTAATgCT       | 20          | 59.01                |              |      |
| I element                                                              | I-1L       | AggTTCgCCTAATTgggATT       | 20          | 59.80                |              |      |
| P element                                                              | P31IR01    | TTCGACGGGACCACCTTAT        | 19          | 60.32                |              |      |
| 297                                                                    | 297_F_F1   | CGCAGCATTCGTTTATCTTTGG     | 22          | 63.89                | 297 F1       | b    |
| 297                                                                    | 297_F_F2   | TGACCTAAGCAGATTTGACTGCC    | 23          | 62.83                | 297 F1       | b    |
| 297                                                                    | 297_F_F3   | CATTCGTTTATCTTTGGCAGCG     | 22          | 63.89                | 297 F        | b    |
| 297                                                                    | 297_F_F4   | AAGCAGATTTGACTGCCCTC       | 20          | 59.43                | 297 F        | b    |
| 297                                                                    | 297_F_F5   | GGTCCAAACCAGCCACTTC        | 20          | 64.04                | 297 F        | b    |
| 297                                                                    | 297_F_R1   | TTGTATTTTCGGGAGAGCCTCGC    | 22          | 66.75                | 297 R1       | b    |
| 297                                                                    | 297_F_R2   | TTGTATTTTCGGGAGAGCCTCG     | 21          | 63.66                | 297 R        | b    |
| 297                                                                    | 297_F_R3   | AGGTCAGGCTTTAGGATGTTTACAAC | 26          | 62.19                | 297 R        | b    |
| 297                                                                    | 297_F_R4   | CAGTTGACTAAGGACAACGCC      | 21          | 59.79                | 297 R        | b    |
| 297                                                                    | 297_F_R5   | GTATTTTCGGGAGAGCCTCGC      | 20          | 63.35                | 297 R        | b    |
| roo                                                                    | roo_F_F1   | TGTTATCTAAGGCGACATGGGTG    | 23          | 63.25                | Roo F        | b    |
| roo                                                                    | roo_F_F2   | ACAGATAAGGTCCTCGCCGC       | 20          | 63.82                | Roo F        | b    |
| roo                                                                    | roo_F_F3   | TGAGTCAGTCACTTGAGATCGTTC   | 24          | 60.86                | Roo F        | b    |
| roo                                                                    | roo_F_R1   | CTAAGGGACTATTTTAGGAGGCGG   | 24          | 62.53                | Roo R        | b    |
| roo                                                                    | roo_F_R2   | CCTAAGTAAATAGTCCCCGCC      | 21          | 59.03                | Roo R        | b    |
| roo                                                                    | roo_F_R3   | AAATAGTCCCCGCTTATCG        | 20          | 60.29                | Roo R        | b    |
| jockey                                                                 | jockey_L_1 | AAGAAGACTCAAGCGACACC       | 20          | 57.1                 | lower        | c    |
| P element                                                              | P_L_u      | GCCTTCTTTTATCTTTTCTGG      | 21          | 55.06                | upper        | d    |
| Gypsy                                                                  | gypsy_LP_U | CTATTAAGTCATCCATATAAAGGAA  | 25          | 53.22                | Upp1_reverse | e    |
| Gypsy                                                                  | gypsy_LP_L | TTCTATGACTTCTTTCTACTACTCC  | 25          | 52.58                | Low1_reverse | e    |

- (a) Rozen and Skaletsky (2000) Bioinformatics Methods and Protocols: Methods in Molecular Biology. Humana Press, Totowa, NJ, pp 365-386
- (b) Franchini LF, Ganko EW, McDonald JF (2004) Retrotransposon-gene associations are widespread among *D. melanogaster* populations. Mol Biol Evol 21(7): 1323-1331.
- (c) Zatselpina OG, Velikodvorskaia VV, Molodtsov VB, Garbuz D, Lerman DN et al. (2001) A *Drosophila melanogaster* strain from sub-equatorial Africa has exceptional thermotolerance but decreased Hsp70 expression. J Exp Biol 204(11): 1869-1881.
- (d) Lerman DN, Michalak P, Helin AB, Bettencourt BR, Feder ME (2003) Modification of heat-shock gene expression in *Drosophila melanogaster* populations via transposable elements. Mol Biol Evol 20(1): 135-144.
- (e) Lepetit D, Brehm A, Fouillet P, Biemont C (2002) Insertion polymorphism of retrotransposable elements in populations of the insular, endemic species *Drosophila madeirensis*. Mol Ecol 11(3): 347-354.
