# Supplementary material
Source: PubMed Central journal article supplement (PMC1630442)
Supplement: pgen.0020165.st006.pdf [file pgen.0020165.st006.pdf]

| Table S6: Primers for intergenic regions |                 |             |                       | Length | Tm    | PCR product |
|------------------------------------------|-----------------|-------------|-----------------------|--------|-------|-------------|
|                                          | Gene            | Primer      | Sequence 5'-3'        | [bp]   | [°C]  | [bp]        |
| 1                                        | <i>Hsp22</i>    | Hsp22_s23   | ATGCGATTCGGGAACATATC  | 20     | 59.75 | 2038bp      |
| 1                                        |                 | Hsp22_s24   | GCCAAAACATCGGTAAGGAA  | 20     | 59.94 |             |
| 1                                        | <i>Hsp67Ba</i>  | Hsp67Ba_s21 | ATTGAAATCGTGCAGCTCCT  | 20     | 59.84 | 2643bp      |
| 1                                        | <i>Hsp23</i>    | Hsp23_s22   | CAAGGCTCAACAACAATGGA  | 20     | 59.69 |             |
| 1                                        | <i>Hsp26</i>    | Hsp26_s1    | gCgAAAgCgAgTAgATAgC   | 20     | 54.7  | 996bp       |
| 1                                        |                 | Hsp67Ba_s2  | CAAAAACCAAggCgAAAATg  | 20     | 60.46 |             |
| 1                                        | <i>Hsp27</i>    | Hsp23_s5    | TTTgTCCgCCgCTATgCTCTg | 21     | 67.76 | 2210bp      |
| 1                                        |                 | Hsp27_s6    | CCTCgTgCTTCCCCTCTACCA | 21     | 65.89 |             |
| 1                                        | <i>Hsp68</i>    | Hsp68_s27   | GCGTTGAATTGCTTCAGAGG  | 20     | 60.91 | 1553bp      |
| 1                                        |                 | Hsp68_s28   | GGTACGGTTACCCTGGTCGT  | 20     | 61.05 |             |
| 1                                        | <i>Hsp70Aa*</i> | Hsp70Aa_s11 | CATCCCAAAAATCTgTAAAgC | 21     | 56.44 | 1429bp      |
| 1                                        |                 | Hsp70Ab_s12 | ACTgTgTTTCTggggTTCAT  | 20     | 56.9  |             |
| 1                                        | <i>Hsp70Aa</i>  | 70AaF01     | GCAGGCATTGTGTGTGAGTT  | 20     | 59.76 | 1264bp      |
| 1                                        |                 | 70AaR02     | GCCCCTTTGAGTTGTAACCAT | 21     | 60.24 |             |
| 1                                        | <i>Hsp70Ab</i>  | 70AbF03     | CGGCACCATAAGCATAACCT  | 20     | 59.98 | 846bp       |
| 1                                        |                 | 70AbR04     | TCATGTCTCTGCGATCTTG   | 20     | 59.94 |             |
| 1                                        | <i>Hsp83</i>    | CG14965_s9  | TTAggTgTTgCTgCTTTggAg | 21     | 60.43 | 2856bp      |
| 1                                        |                 | Hsp83_s10   | CATCgTTgTTCTTggAggTgA | 21     | 61.08 |             |
| 1                                        | <i>HsrOmega</i> | HsrO_s31    | ATTCGCGTCTGAATGAGGAC  | 20     | 60.23 | 2810bp      |
| 1                                        |                 | HsrO_s32    | GTA CTGCTGCTGCTCGTCTG | 20     | 59.95 |             |
| 1                                        | <i>DnaJ-1</i>   | DnaJ-1_s33  | GTTCCGTTCCGGCTGTTTTAC | 20     | 59.61 | 1475bp      |
| 1                                        |                 | DnaJ-1_s34  | CGAGGCCAGAATCTTG TAG  | 20     | 59.83 |             |
| 1                                        | <i>DnaJ-60</i>  | DnaJ-60_s13 | gCTCTTTCTCCTTgTTTTT   | 19     | 51.33 | 2484bp      |
| 1                                        |                 | DnaJ-60_s14 | TAgTCCCCGATgATgTgC    | 19     | 61.87 |             |
| 1                                        | <i>DnaJ</i>     | DnaJ_s35    | CAGCTGGAGCAGGTAGATCC  | 20     | 59.97 | 622bp       |
| 1                                        |                 | DnaJ_3      | TGGAGAGGATTCGGTAGGAG  | 20     | 59.23 |             |
| 1                                        | <i>CG9920</i>   | CG9920_s36  | TGATCGGTGTCCAAGTCAAC  | 20     | 59.53 | 2827bp      |
| 1                                        |                 | CG9920_5    | CCTCGAAACGCTGGATTAGA  | 20     | 60.34 |             |
| 1                                        | <i>Hsp60</i>    | Hsp60_s15   | AgCgTAATCAgCgAAAATg   | 19     | 56.59 | 2185bp      |
| 1                                        |                 | Hsp60_s16   | ggAgCgAgCAAgCgAAACT   | 19     | 63.05 |             |
| 1                                        | <i>Hsp60b</i>   | Hsp60b_s29  | GATCCAGGAATTCGTCTGC   | 20     | 59.63 | 1661bp      |
| 1                                        |                 | Hsp60b_s30  | ATCATCATTGCCCGTACTCC  | 20     | 59.78 |             |
| 1                                        | <i>Hsc70-2</i>  | Hsc70-2_s19 | TATgCgCCCATgACTATgAg  | 20     | 59.67 | 1409bp      |
| 1                                        |                 | Hsc70-2_s20 | TCTCCACCTTgCTgTTCTgC  | 20     | 61.55 |             |

|   |                 |              |                        |    |       |        |
|---|-----------------|--------------|------------------------|----|-------|--------|
| 1 | <i>Hsc70-3</i>  | Hsc70-3_s41  | ACTCAAGTGCCAGGATACGG   | 20 | 60.13 | 2879bp |
| 1 |                 | Hsc70-3_s38  | CACCTACCACTGACGTGTCTG  | 20 | 60.22 |        |
| 1 | <i>Hsc70-4</i>  | Hsc70-4_7    | CTGAAGGTCCCCGAGTATCC   | 20 | 60.84 | 2402bp |
| 1 |                 | Hsc70-4_s39  | ATCGGTGAAGGCAACATAGG   | 20 | 59.96 |        |
| 1 | <i>Hsc70-5</i>  | Hsc70_5-7    | GATTGGTCCGCTGCTGTAGA   | 20 | 61.35 | 1732bp |
| 1 |                 | Hsc70-5_s40  | AGTTGGTTGTTCCAGATCG    | 20 | 59.97 |        |
| 1 | <i>Hsp67Ba</i>  | Hsp67Ba_s21  | ATTGAAATCGTGCAGCTCCT   | 20 | 59.84 | 2643bp |
| 1 | <i>Hsp23</i>    | Hsp23_s22    | CAAGGCTCAACAACAATGGA   | 20 | 59.69 |        |
| 2 | <i>Gapdh1</i>   | Gapdh1_s42   | TCTTCTGGCCTCTGGAGTTG   | 20 | 60.52 | 835bp  |
| 2 |                 | Gapdh1_1     | TCCGTTAATTCCGATCTTCG   | 20 | 60.03 |        |
| 2 | <i>βTub56Da</i> | βTub56Da_s43 | AGGGAAATCGTTCACATCCA   | 20 | 60.3  | 2129bp |
| 2 |                 | βTub56Da_s44 | CACCCATGTACGCCATCATA   | 20 | 60.2  |        |
| 2 | <i>βTub56Db</i> | βTub56Db_s45 | GGCCACAAAGAGAATAGCACA  | 20 | 60.26 | 1298bp |
| 2 |                 | βTub56Db_s46 | CTGACCAGCTTGGATGTGAA   | 20 | 59.83 |        |
| 2 | <i>Adh</i>      | Adh_s47      | GTCTGGACACCAGCAAGGAG   | 20 | 60.9  | 1708bp |
| 2 |                 | Adh_s48      | TGGGGATTTTCCGTA CTCTG  | 20 | 59.9  |        |
| 2 | <i>Sgs4</i>     | Sgs4_s49     | CAACCAGGGTAACGAAAAGC   | 20 | 59.6  | 954bp  |
| 2 |                 | Sgs4_4       | ACTCCAAGCGCATCTTGACT   | 20 | 60    |        |
| 2 | <i>Su(s)</i>    | Su(s)_7      | CGATAAATTGCACTCGCTGA   | 20 | 60    | 3018bp |
| 2 |                 | Su(s)_s50    | GAAGATTGCTGCTCGTCCTC   | 20 | 60.1  |        |
| 2 | <i>Act5C</i>    | Act5C_s51    | GGATACTCCTCCCGACACAA   | 20 | 59.9  | 1998bp |
| 2 |                 | Act5C_4      | AGGATAACCACGCTTGCTCTG  | 20 | 60.4  |        |
| 2 | <i>RpL32</i>    | RpL32_s52    | GAATGCGTTTTGTGTGTTGG   | 20 | 60    | 2054bp |
| 2 |                 | RpL32_6      | CTCTGTTGTCGATAACCCTTGG | 21 | 59.8  |        |
| 2 | <i>Elf</i>      | Elf_a_s53    | GCGATCCCTGGGTATGTAGA   | 20 | 60.8  | 1461bp |
| 2 |                 | Elf_a_s54    | ACTGGGCACAAATTCTACCG   | 20 | 59.2  |        |
| 2 | <i>Elf</i>      | Elf_b_s55    | CCACATCATCCTCCAATTCC   | 20 | 60.1  | 2601bp |
| 2 |                 | Elf_b_s56    | CGTGAACTCAGCATCTTCCA   | 20 | 60    |        |
| 2 | <i>CG32061</i>  | CG31061_7    | CACATCGCTACTTCGTTTCT   | 20 | 58    | 1117bp |
| 2 |                 | CG8040_s61   | TATGGCCTTAACCAGCATCC   | 20 | 59.9  |        |
| 2 | <i>CG4750</i>   | CG4750_s60   | TTTTCCGTAAGCCCAATGTC   | 20 | 59.9  | 2951bp |
| 2 |                 | CG4750_5     | CACAACACCCTTGGGACTCT   | 20 | 60    |        |
| 2 | <i>αTub84B</i>  | αTub84B_s57  | GTA CTGCCTTTCTGCGTTGG  | 20 | 60.1  | 1484bp |
| 2 |                 | αTub84B_1    | CTCGCTGAAGAAGGTGTTGA   | 20 | 60    |        |
| 2 | <i>αTub84D</i>  | αTub84D_s58  | CCCGTGAAGACGATCAAAGT   | 20 | 60.1  | 1919bp |

|   |                |                   |                       |    |       |        |
|---|----------------|-------------------|-----------------------|----|-------|--------|
| 2 |                | $\alpha$ Tub84D_6 | GTTCCAGTACGGACCTCGTC  | 20 | 59.6  |        |
| 2 | <i>cup</i>     | cup_s59           | GATCACCTTCTGCCAAAGT   | 20 | 59.1  | 595bp  |
| 2 |                | Cup_7             | AATTCGATCGCCTCCTCTTT  | 20 | 60.2  |        |
| 3 | <i>CG7906</i>  | CG7906_s62        | TGAGCTATGCACCAAGTTCG  | 20 | 60.01 | 2900bp |
| 3 |                | CG7906_1          | GCCAATCCACAGGTCCACTC  | 20 | 62.88 |        |
| 3 | <i>CG7924</i>  | CG7924_s63        | AGGCCTTCCAGGAAAAGGAG  | 20 | 61.95 | 2086bp |
| 3 |                | CG7924_3          | GTGATTGGGAATGCCAGGAT  | 20 | 62.03 |        |
| 3 | <i>CG15634</i> | CG15634_s64       | ACATTCCCACGTTCTGTGAG  | 20 | 58.57 | 1008bp |
| 3 |                | CG15634_1         | GGAACCAGGATAACCGAGTC  | 20 | 58.45 |        |
| 3 | <i>Sep5</i>    | Sep5_s65          | GGCTCCGTCTCGATGACTAC  | 20 | 59.83 | 1345bp |
| 3 |                | Sep5_6            | TTCTGGACGCTCTTGTGAC   | 20 | 59.01 |        |
| 3 | <i>CG10591</i> | CG10591_s66       | CGGCCTTCTACTTTGGCTAC  | 20 | 59    | 2397bp |
| 3 |                | CG10591_5         | CAAGAGCATTTACCAACGA   | 20 | 59.84 |        |
| 3 | <i>slam</i>    | slam_s67          | CGACCAGTACCATGACTCC   | 20 | 56.35 | 3561bp |
| 3 |                | slam_7            | TTGTAAGTGTGGCTTTCTGG  | 20 | 56.43 |        |
| 3 | <i>Srp54</i>   | Srp54_s68         | GTCACTATCGGCCATCACCT  | 20 | 59.96 | 1224bp |
| 3 |                | Srp54_6           | ACTTGGGGTCGTACGTCTTG  | 20 | 60.03 |        |
| 3 | <i>TH1</i>     | TH1_s69           | CTGTACACGCCGAAAAGTT   | 20 | 60.2  | 760bp  |
| 3 |                | TH1_4             | GTAATATCCCCGGCTCCAT   | 20 | 60    |        |
| 3 | <i>Bsg25D</i>  | Bsg25D_s70        | CTGCTTGTCGTTTCAGGAAGC | 20 | 61.12 | 1347bp |
| 3 |                | Bsg25D_7          | GCTGCGGAACATTTGGTAGA  | 20 | 61.17 |        |
| 3 | <i>CG10154</i> | CG10154_s71       | CCACATTGGAGCAGACATTG  | 20 | 60.11 | 1198bp |
| 3 |                | CG10154-4         | TGGACCGGGAGCTACTACAA  | 20 | 60.65 |        |
| 3 | <i>CG7724</i>  | CG7724_6          | TCAACGGCCTTTACTTCTCG  | 20 | 60.38 | 1885bp |
| 3 |                | CG7724_s72        | TTGCTTGATGAGGTGCTGAC  | 20 | 59.99 |        |
| 3 | <i>CG2070</i>  | CG2070_s73        | GAAGTTCTGCGCCTTGCTGT  | 20 | 62.95 | 1787bp |
| 3 |                | CG2070_7          | CAGCGGGCAGAACAGGTAAT  | 20 | 62.46 |        |
| 3 | <i>CG6296</i>  | CG6296_s74        | CACAGCCGCTCAGTGATCTA  | 20 | 60.16 | 831bp  |
| 3 |                | CG6296_5          | TCTCGAACCAGAAAGTTGGTC | 20 | 60.23 |        |

\*Bettencourt BR, Feder ME (2002) Rapid concerted evolution via gene conversion at the *Drosophila* hsp70 genes. *J Mol Evol* 54(5): 569-586.
