# Supplementary material
Source: PubMed Central journal article supplement (PMC1630442)

| Table S7: P element-specific primers for orientation and length |                             |             |         |
|-----------------------------------------------------------------|-----------------------------|-------------|---------|
| Primer                                                          | Sequence 5' - 3'            | Length [bp] | Tm [°C] |
| P82L                                                            | ATTCAGTGCACGTTTGCTTG        | 20          | 59.91   |
| P192L                                                           | CTgCAAAGCTgTgACTggAg        | 20          | 59.77   |
| P225L                                                           | CgTgCCgAAgTgTgCTATTA        | 20          | 59.90   |
| P574L                                                           | ggAgTACgAAATgCgTCgTT        | 20          | 60.14   |
| P774L                                                           | AAggATTTCCTTTgCCCAgT        | 20          | 59.94   |
| P879L                                                           | AgTTgATgACgCCgACAAg         | 19          | 59.85   |
| P1899R                                                          | AACTgCAgTggAgTgggATg        | 20          | 61.13   |
| P2181R                                                          | gCCAgCTTTCAgAgTTgTCC        | 20          | 60.00   |
| P2321                                                           | CGGAGGATGCGATGGAAT          | 18          | 61.97   |
| P2419R                                                          | ATAAgTCCgCCgTgAgACAC        | 20          | 60.14   |
| P2457R                                                          | CATTCTAgCTCTTTTAACTTCTCTTgA | 27          | 58.23   |
| P2549R                                                          | ACgTTTCgCgCTgCTAATA         | 19          | 59.62   |
| P2833R                                                          | gCTTgCAATAAgTgCgAgTg        | 20          | 59.64   |

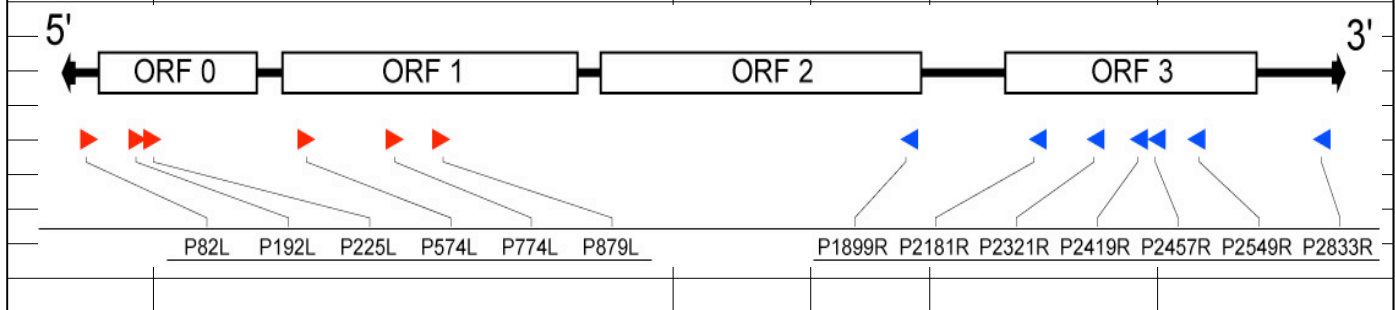

Supplement: pgen.0020165.st007.pdf [file pgen.0020165.st007.pdf]
